# Supplementary material
Source: Springer Nature journal article supplement (https://www.springermedizin.de/resource/supplementary/12943_2013_1511_MOESM2_ESM.pdf/9552310)
Supplement: MOESM2 [file 9552310]

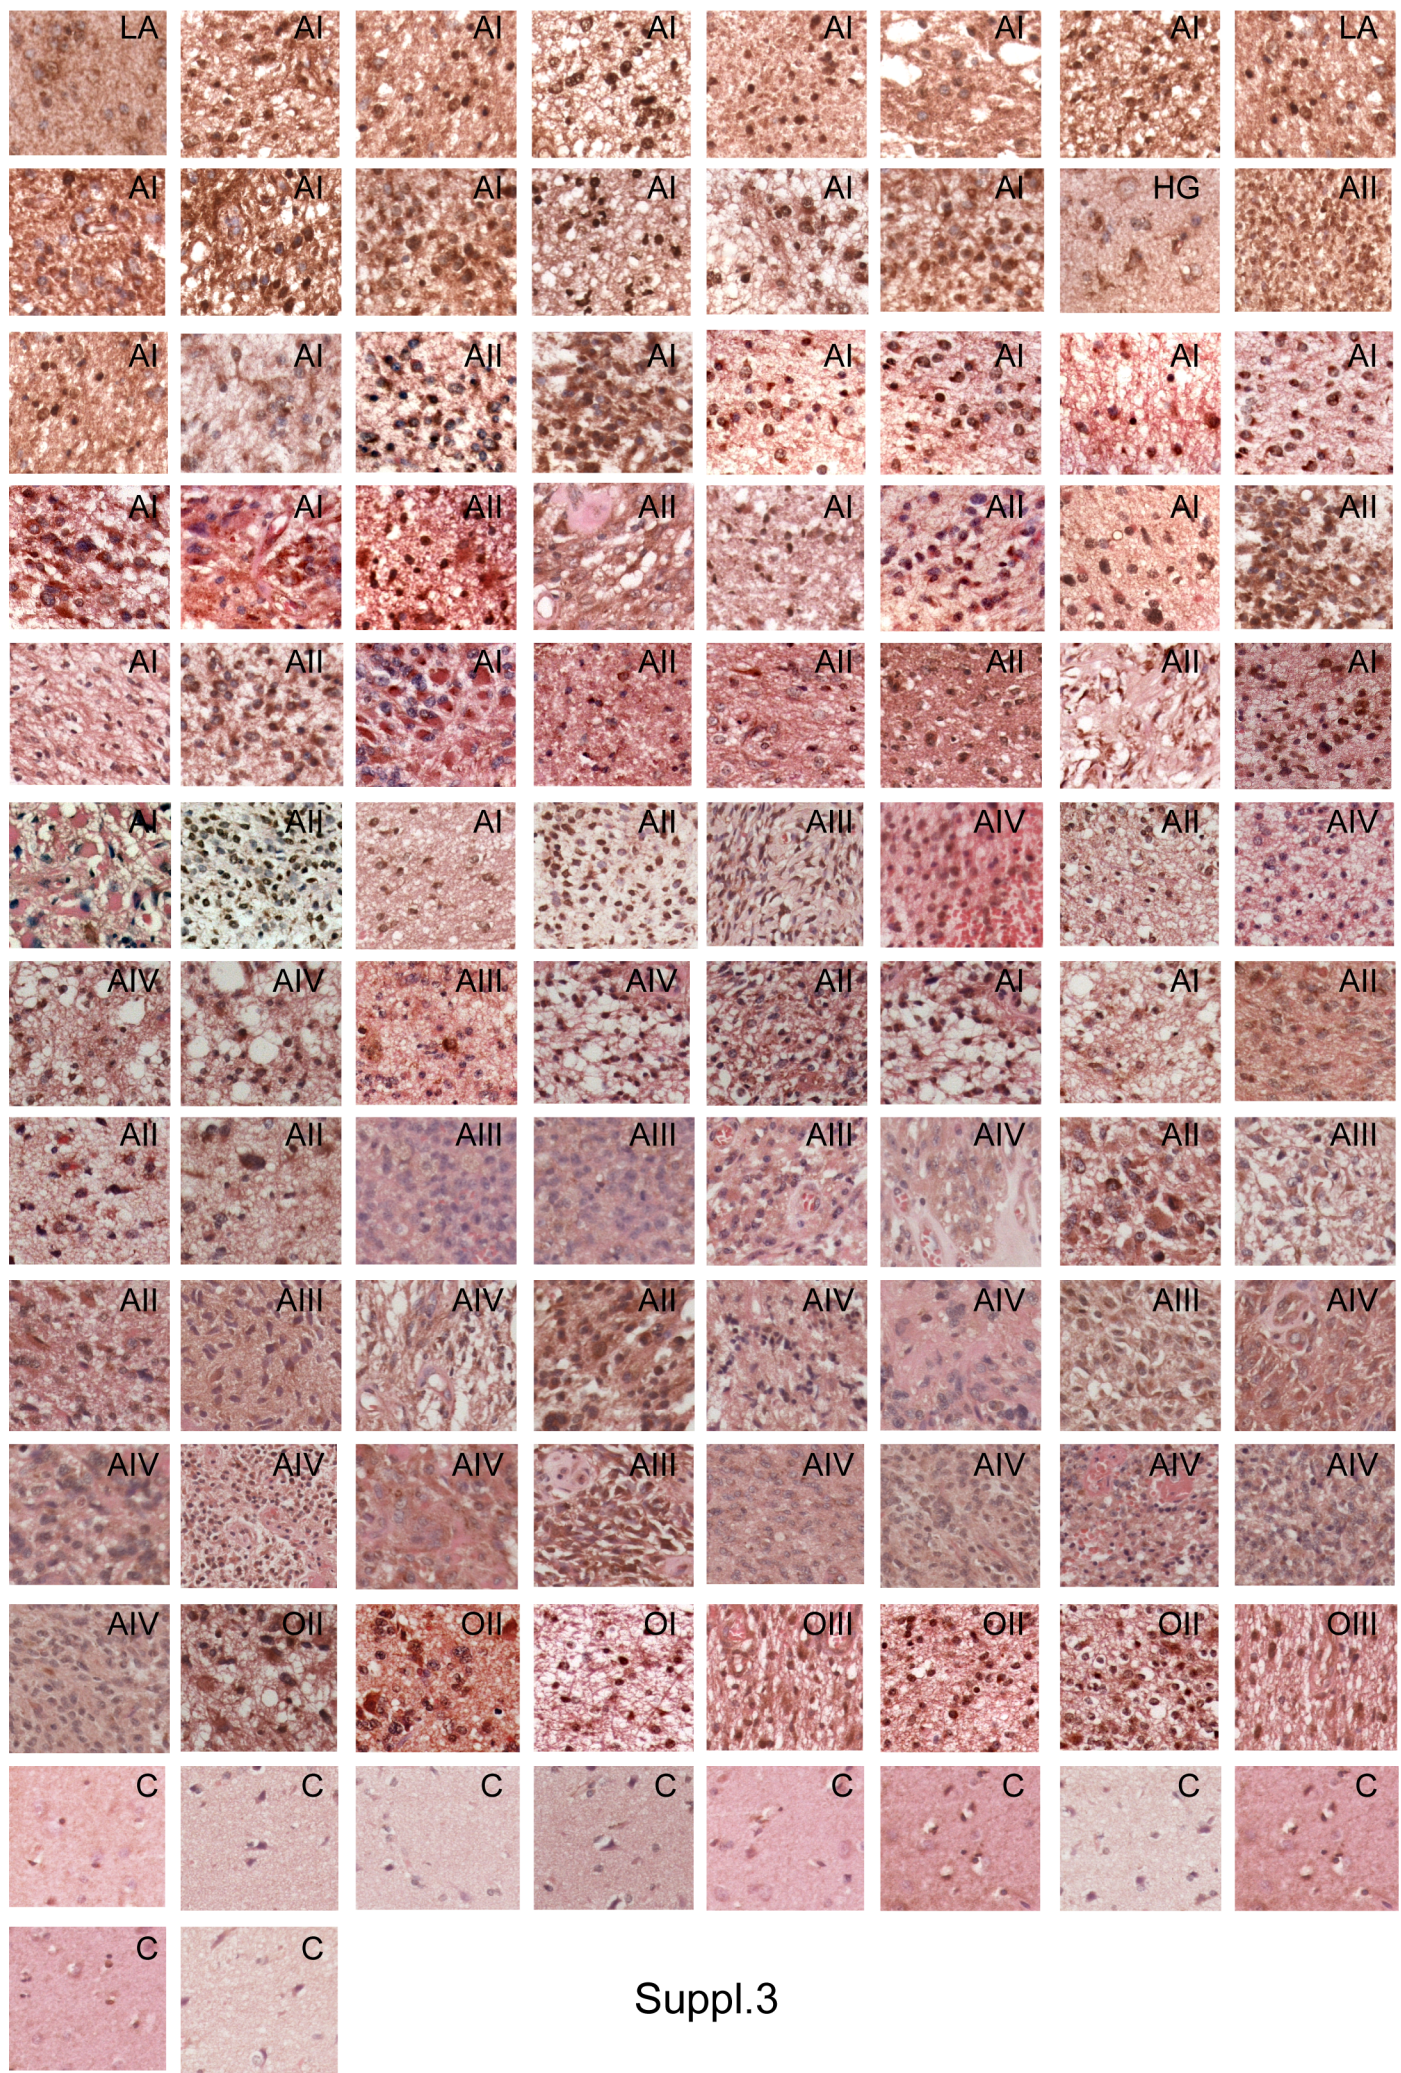

Suppl.3
